# Supplementary material for: Green synthesis of silver and copper-doped zinc oxide nanoflowers using Leucophyllum frutescens leaf extract for photodegradation of methylene blue dye and antibacterial applications
Source: Royal Society of Chemistry journal article supplement (doi:10.1039/d4va00295d), 2024-10-28
Supplement: d4va00295d1.pdf [file d4va00295d1.pdf]

Supplementary Information

## Green synthesis of silver and copper-doped zinc oxide nanoflowers using *Leucophyllum frutescens* leaf extract for photodegradation of methylene blue dye and antibacterial applications

Maitri Nandasana,<sup>a</sup> Tanawat Imboon,<sup>b</sup> Rashbihari Layek,<sup>c</sup> Arindam Dey,<sup>c</sup> Pranav Pandya,<sup>a</sup> Vijay Singh Parihar,<sup>d</sup> Madhumita S. Tawre,<sup>e</sup> Santosh Sutar,<sup>f</sup> Pathik Kumbhakar,<sup>c</sup> Karishma Pardesi,<sup>e</sup> Sirikanjana Thongmee,<sup>b</sup> and Sougata Ghosh<sup>a,b\*</sup>

<sup>a</sup>Department of Microbiology, School of Science, RK. University, Rajkot-260020, Gujarat, India;

<sup>b</sup>Department of Physics, Faculty of Science, Kasetsart University, Bangkok-10900, Thailand;

<sup>c</sup>Department of Physics, National Institute of Technology Durgapur, Durgapur-713209, West Bengal, India;

<sup>d</sup>Biomaterials and Tissue Engineering Group, Faculty of Medicine and Health Technology, Tampere University, Tampere-33720, Finland;

<sup>e</sup>Department of Microbiology, Savitribai Phule Pune University, Pune-411007, Maharashtra, India; and

<sup>f</sup>Yashwantrao Chavan School of Rural Development, Shivaji University, Kolhapur-416004, Maharashtra, India

### List of figures:

| Figures           |                                                                                                                    | Page |
|-------------------|--------------------------------------------------------------------------------------------------------------------|------|
| <b>Figure S1.</b> | UV-visible spectra of the undoped and doped ZnONPs at a concentration of using 5 mg/50 mL (0.1 mg/mL).             | S3   |
| <b>Figure S2.</b> | Hydrodynamic size distribution of ZnONPs where red, blue and green color represents readings in triplicates.       | S4   |
| <b>Figure S3.</b> | Hydrodynamic size distribution of Ag@ZnONPs where red, blue and green color represents readings in triplicates.    | S5   |
| <b>Figure S4.</b> | Hydrodynamic size distribution of Cu@ZnONPs where red, blue and green color represents readings in triplicates.    | S6   |
| <b>Figure S5.</b> | Hydrodynamic size distribution of Ag-Cu@ZnONPs where red, blue and green color represents readings in triplicates. | S7   |
| <b>Figure S6.</b> | DLS summary for size distribution of ZnONPs (n = 3).                                                               | S8   |
| <b>Figure S7.</b> | DLS summary for size distribution of Ag@ZnONPs (n = 3).                                                            | S8   |
| <b>Figure S8.</b> | DLS summary for size distribution of Cu@ZnONPs (n = 3).                                                            | S8   |

|                    |                                                             |    |
|--------------------|-------------------------------------------------------------|----|
| <b>Figure S9.</b>  | DLS summary for size distribution of Ag-Cu@ZnONPs (n = 3).  | S8 |
| <b>Figure S10.</b> | Zeta potential summary statistics for ZnONPs (n = 3).       | S9 |
| <b>Figure S11.</b> | Zeta potential summary statistics for Ag@ZnONPs (n = 3).    | S9 |
| <b>Figure S12.</b> | Zeta potential summary statistics for Cu@ZnONPs (n = 3).    | S9 |
| <b>Figure S13.</b> | Zeta potential summary statistics for Ag-Cu@ZnONPs (n = 3). | S9 |

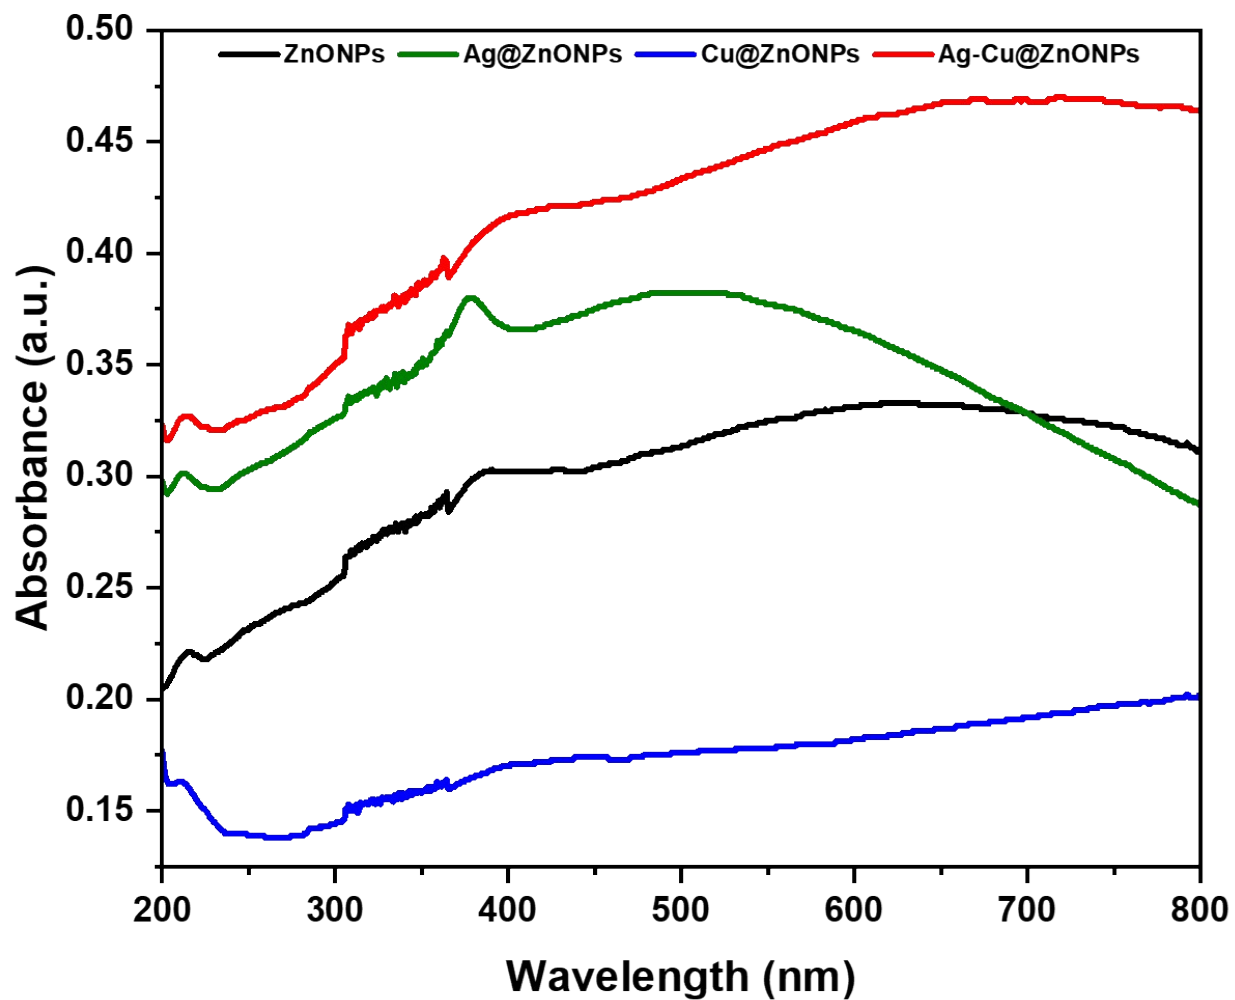

**Figure S1.** UV-visible spectra of the undoped and doped ZnONPs at a concentration of using 5 mg/50 mL (0.1 mg/mL).

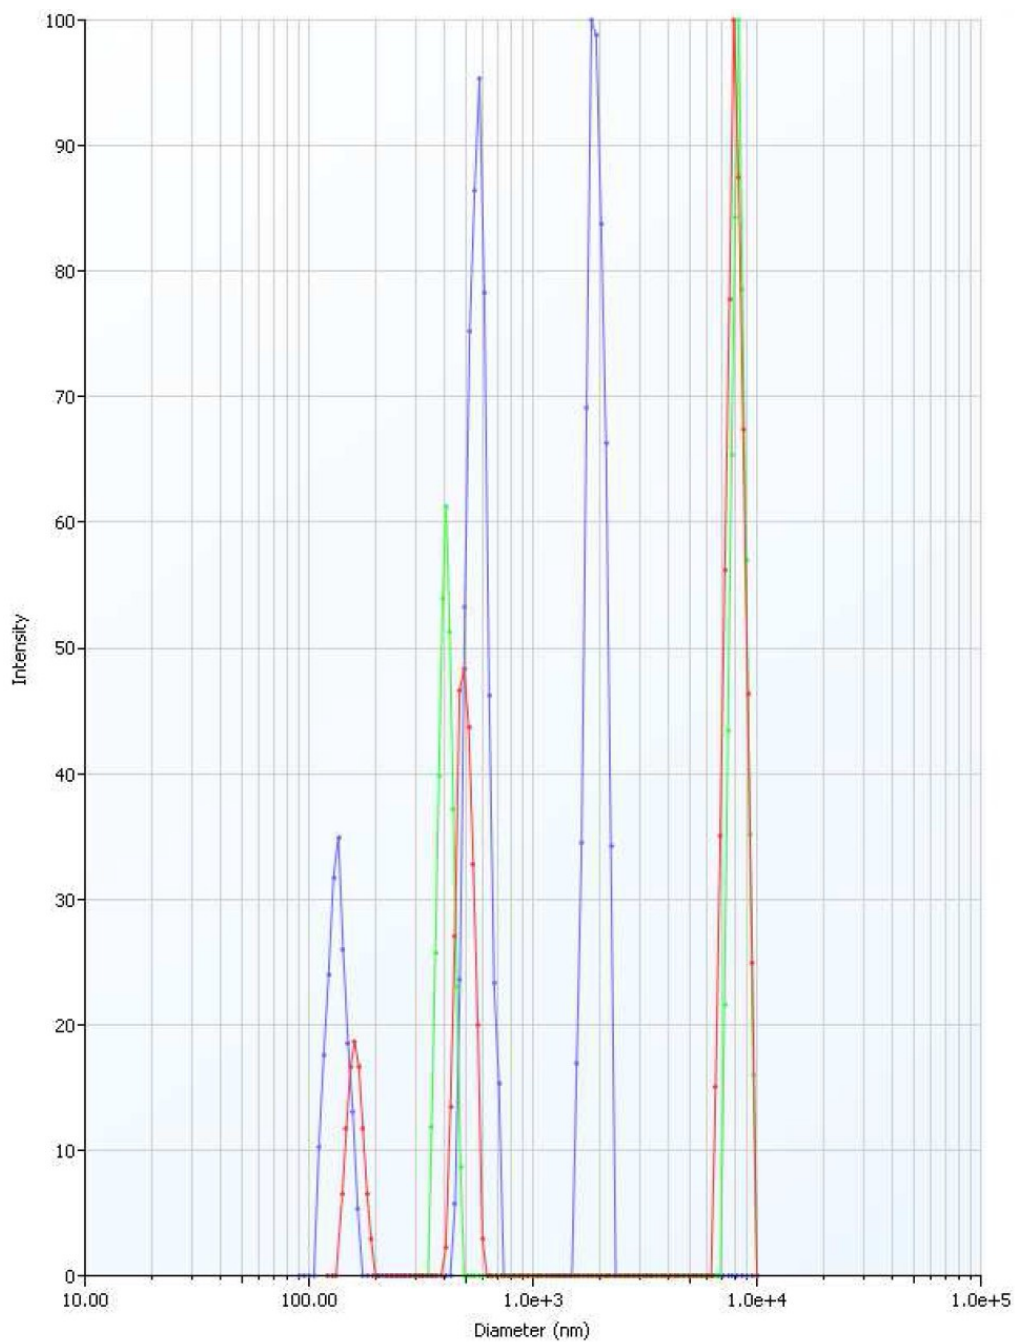

**Figure S2.** Hydrodynamic size distribution of ZnONPs where red, blue and green color represents readings in triplicates.

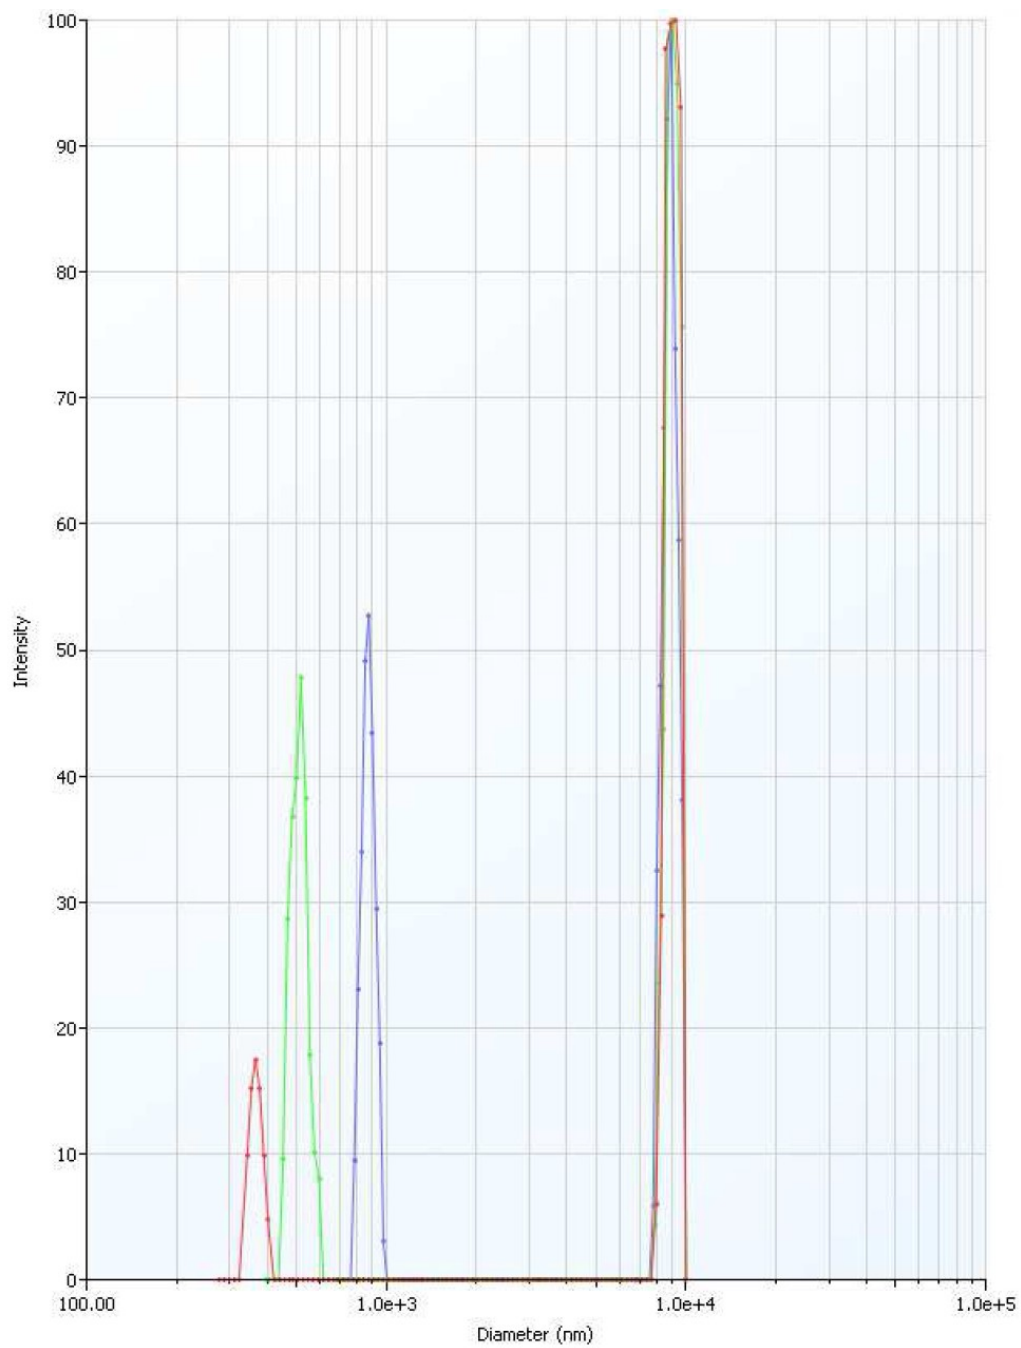

**Figure S3.** Hydrodynamic size distribution of Ag@ZnONPs where red, blue and green color represents readings in triplicates.

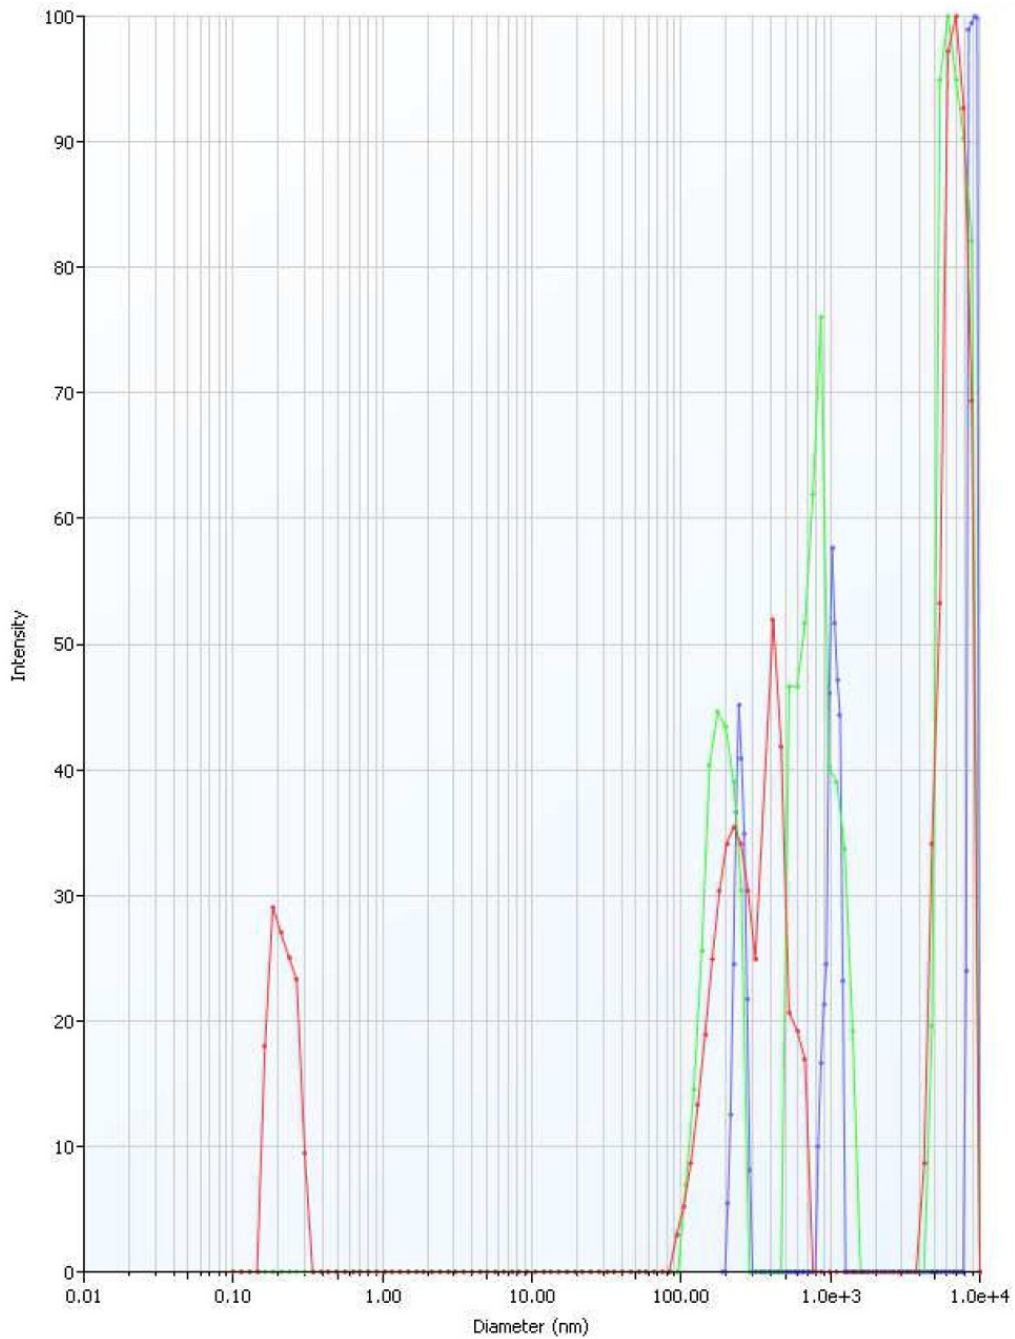

**Figure S4.** Hydrodynamic size distribution of Cu@ZnONPs where red, blue and green color represents readings in triplicates.

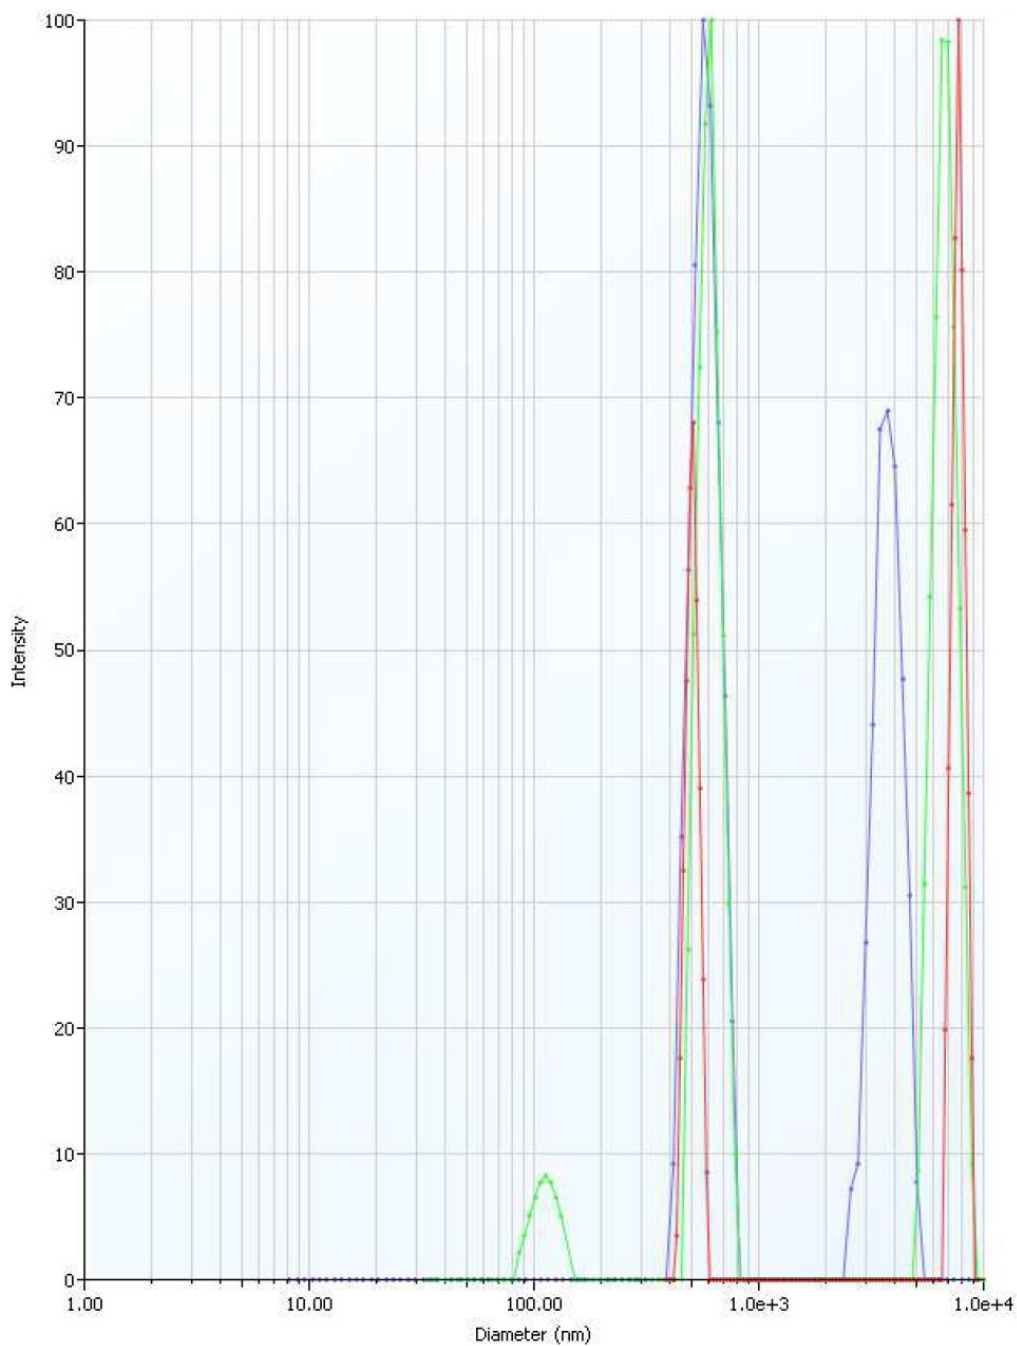

**Figure S5.** Hydrodynamic size distribution of Ag-Cu@ZnONPs where red, blue and green color represents readings in triplicates.

| Type | Start Date/Time     | Sample ID | Eff. Diam. (nm) | Polydispersity | Baseline Index | Count Rate (kcps) | Data Retained (%) | Diffusion Coeff. (cm <sup>2</sup> /s) |
|------|---------------------|-----------|-----------------|----------------|----------------|-------------------|-------------------|---------------------------------------|
| DLS  | 07-08-2024 14:45:42 | M1 - 1    | 1,824.67        | 0.376          | 0.0            | 56.6              | 99.32             | 2.690e-09                             |
| DLS  | 07-08-2024 14:47:43 | M1 - 2    | 1,857.20        | 0.391          | 0.0            | 54.4              | 98.44             | 2.642e-09                             |
| DLS  | 07-08-2024 14:49:44 | M1 - 3    | 1,055.87        | 0.217          | 0.0            | 53.3              | 98.69             | 4.648e-09                             |
|      |                     | Mean:     | 1,579.25        | 0.328          | 0.0            | 54.8              | 98.82             | 3.327e-09                             |
|      |                     | Std Err:  | 261.86          | 0.056          | 0.0            | 1.0               | 0.26              | 6.608e-10                             |
|      |                     | Std Dev:  | 453.55          | 0.096          | 0.0            | 1.7               | 0.45              | 1.144e-09                             |

**Figure S6.** DLS summary for size distribution of ZnONPs (n = 3).

| Type | Start Date/Time     | Sample ID | Eff. Diam. (nm) | Polydispersity | Baseline Index | Count Rate (kcps) | Data Retained (%) | Diffusion Coeff. (cm <sup>2</sup> /s) |
|------|---------------------|-----------|-----------------|----------------|----------------|-------------------|-------------------|---------------------------------------|
| DLS  | 08-08-2024 12:15:49 | M2 - 1    | 4,468.45        | 0.657          | 0.0            | 4.1               | 96.73             | 1.098e-09                             |
| DLS  | 08-08-2024 12:17:50 | M2 - 2    | 2,534.94        | 0.448          | 0.0            | 4.8               | 95.84             | 1.936e-09                             |
| DLS  | 08-08-2024 12:19:51 | M2 - 3    | 2,831.84        | 0.436          | 0.0            | 4.3               | 94.22             | 1.733e-09                             |
|      |                     | Mean:     | 3,278.41        | 0.513          | 0.0            | 4.4               | 95.60             | 1.589e-09                             |
|      |                     | Std Err:  | 601.16          | 0.072          | 0.0            | 0.2               | 0.74              | 2.523e-10                             |
|      |                     | Std Dev:  | 1,041.24        | 0.124          | 0.0            | 0.4               | 1.28              | 4.370e-10                             |

**Figure S7.** DLS summary for size distribution of Ag@ZnONPs (n = 3).

| Type | Start Date/Time     | Sample ID | Eff. Diam. (nm) | Polydispersity | Baseline Index | Count Rate (kcps) | Data Retained (%) | Diffusion Coeff. (cm <sup>2</sup> /s) |
|------|---------------------|-----------|-----------------|----------------|----------------|-------------------|-------------------|---------------------------------------|
| DLS  | 07-08-2024 15:06:52 | M3 - 1    | 1,410.39        | 0.334          | 0.0            | 2.5               | 94.29             | 3.480e-09                             |
| DLS  | 07-08-2024 15:08:53 | M3 - 2    | 1,120.76        | 0.258          | 0.0            | 2.4               | 92.49             | 4.379e-09                             |
| DLS  | 07-08-2024 15:10:54 | M3 - 3    | 1,505.75        | 0.298          | 0.0            | 2.5               | 96.00             | 3.259e-09                             |
|      |                     | Mean:     | 1,345.63        | 0.297          | 0.0            | 2.5               | 94.26             | 3.706e-09                             |
|      |                     | Std Err:  | 115.76          | 0.022          | 0.0            | 0.0               | 1.01              | 3.424e-10                             |
|      |                     | Std Dev:  | 200.50          | 0.038          | 0.0            | 0.1               | 1.75              | 5.931e-10                             |

**Figure S8.** DLS summary for size distribution of Cu@ZnONPs (n = 3).

| Type | Start Date/Time     | Sample ID | Eff. Diam. (nm) | Polydispersity | Baseline Index | Count Rate (kcps) | Data Retained (%) | Diffusion Coeff. (cm <sup>2</sup> /s) |
|------|---------------------|-----------|-----------------|----------------|----------------|-------------------|-------------------|---------------------------------------|
| DLS  | 07-08-2024 17:17:24 | M4 - 1    | 1,748.43        | 0.361          | 0.0            | 488.4             | 95.78             | 2.807e-09                             |
| DLS  | 07-08-2024 17:19:25 | M4 - 2    | 1,272.04        | 0.301          | 0.0            | 472.8             | 92.61             | 3.858e-09                             |
| DLS  | 07-08-2024 17:21:26 | M4 - 3    | 995.33          | 0.252          | 0.0            | 470.4             | 97.44             | 4.931e-09                             |
|      |                     | Mean:     | 1,338.60        | 0.305          | 0.0            | 477.2             | 95.28             | 3.865e-09                             |
|      |                     | Std Err:  | 219.93          | 0.031          | 0.0            | 5.7               | 1.41              | 6.131e-10                             |
|      |                     | Std Dev:  | 380.94          | 0.055          | 0.0            | 9.8               | 2.45              | 1.062e-09                             |

**Figure S9.** DLS summary for size distribution of Ag-Cu@ZnONPs (n = 3).



| Type | Start Date/Time     | Sample ID | Zeta Potential (mV) | Mobility ( $\mu\text{s}/(\text{V}/\text{cm})$ ) | Conductance ( $\mu\text{S}$ ) | Sample Count Rate (kcps) | Ref. Count Rate (kcps) | RMS Residual |
|------|---------------------|-----------|---------------------|-------------------------------------------------|-------------------------------|--------------------------|------------------------|--------------|
| PALS | 07-08-2024 14:54:18 | M1 - 1    | -3.93               | -0.31                                           | 463                           | 525                      | 830                    | 1.6574e-02   |
| PALS | 07-08-2024 14:54:32 | M1 - 2    | -3.87               | -0.30                                           | 463                           | 525                      | 830                    | 2.9453e-02   |
| PALS | 07-08-2024 14:54:47 | M1 - 3    | -3.48               | -0.27                                           | 463                           | 525                      | 830                    | 3.8075e-02   |
|      |                     | Mean:     | -3.76               | -0.29                                           | 463                           | 525                      | 830                    | 2.8034e-02   |
|      |                     | Std Err:  | 0.14                | 0.01                                            | 0                             | 0                        | 0                      | 6.2470e-03   |
|      |                     | Std Dev:  | 0.25                | 0.02                                            | 0                             | 0                        | 0                      | 1.0820e-02   |

**Figure S10.** Zeta potential summary statistics for ZnONPs (n = 3).

| Type | Start Date/Time     | Sample ID | Zeta Potential (mV) | Mobility ( $\mu\text{s}/(\text{V}/\text{cm})$ ) | Conductance ( $\mu\text{S}$ ) | Sample Count Rate (kcps) | Ref. Count Rate (kcps) | RMS Residual |
|------|---------------------|-----------|---------------------|-------------------------------------------------|-------------------------------|--------------------------|------------------------|--------------|
| PALS | 07-08-2024 15:00:54 | M2 - 1    | -38.97              | -3.05                                           | 317                           | 689                      | 1,437                  | 2.1515e-02   |
| PALS | 07-08-2024 15:00:58 | M2 - 2    | -37.47              | -2.93                                           | 317                           | 689                      | 1,437                  | 2.1276e-02   |
| PALS | 07-08-2024 15:01:02 | M2 - 3    | -38.51              | -3.01                                           | 317                           | 689                      | 1,437                  | 2.3460e-02   |
|      |                     | Mean:     | -38.32              | -2.99                                           | 317                           | 689                      | 1,437                  | 2.2084e-02   |
|      |                     | Std Err:  | 0.45                | 0.03                                            | 0                             | 0                        | 0                      | 6.9160e-04   |
|      |                     | Std Dev:  | 0.77                | 0.06                                            | 0                             | 0                        | 0                      | 1.1979e-03   |

**Figure S11.** Zeta potential summary statistics for Ag@ZnONPs (n = 3).

| Type | Start Date/Time     | Sample ID | Zeta Potential (mV) | Mobility ( $\mu\text{s}/(\text{V}/\text{cm})$ ) | Conductance ( $\mu\text{S}$ ) | Sample Count Rate (kcps) | Ref. Count Rate (kcps) | RMS Residual |
|------|---------------------|-----------|---------------------|-------------------------------------------------|-------------------------------|--------------------------|------------------------|--------------|
| PALS | 07-08-2024 15:16:16 | M3 - 1    | -30.96              | -2.42                                           | 377                           | 594                      | 826                    | 6.4433e-02   |
| PALS | 07-08-2024 15:16:31 | M3 - 2    | -33.53              | -2.62                                           | 377                           | 594                      | 826                    | 2.6660e-02   |
| PALS | 07-08-2024 15:16:45 | M3 - 3    | -34.27              | -2.68                                           | 377                           | 594                      | 826                    | 4.0356e-02   |
|      |                     | Mean:     | -32.92              | -2.57                                           | 377                           | 594                      | 826                    | 4.3816e-02   |
|      |                     | Std Err:  | 1.00                | 0.08                                            | 0                             | 0                        | 0                      | 1.1040e-02   |
|      |                     | Std Dev:  | 1.74                | 0.14                                            | 0                             | 0                        | 0                      | 1.9123e-02   |

**Figure S12.** Zeta potential summary statistics for Cu@ZnONPs (n = 3).

| Type | Start Date/Time     | Sample ID | Zeta Potential (mV) | Mobility ( $\mu\text{s}/(\text{V}/\text{cm})$ ) | Conductance ( $\mu\text{S}$ ) | Sample Count Rate (kcps) | Ref. Count Rate (kcps) | RMS Residual |
|------|---------------------|-----------|---------------------|-------------------------------------------------|-------------------------------|--------------------------|------------------------|--------------|
| PALS | 07-08-2024 17:25:27 | M4 - 1    | -29.96              | -2.34                                           | 394                           | 529                      | 649                    | 2.3765e-02   |
| PALS | 07-08-2024 17:25:41 | M4 - 2    | -26.05              | -2.04                                           | 394                           | 529                      | 649                    | 2.8702e-02   |
| PALS | 07-08-2024 17:25:55 | M4 - 3    | -22.97              | -1.80                                           | 394                           | 529                      | 649                    | 6.1550e-02   |
|      |                     | Mean:     | -26.33              | -2.06                                           | 394                           | 529                      | 649                    | 3.8006e-02   |
|      |                     | Std Err:  | 2.02                | 0.16                                            | 0                             | 0                        | 0                      | 1.1858e-02   |
|      |                     | Std Dev:  | 3.50                | 0.27                                            | 0                             | 0                        | 0                      | 2.0539e-02   |

**Figure S13.** Zeta potential summary statistics for Ag-Cu@ZnONPs (n = 3).
